# Supplementary material
Source: Research Square preprint supplement (doi:10.21203/rs.3.rs-9535074/v1)
Supplement: Supplementary file 1 [file 34233d0d3c9397ed56bd0a00.docx]

The retrograde labeling from the CMT and the anterograde labeling from the LC demonstrate a robust, reciprocal LC–CMT pathway, confirming that CMT both receives noradrenergic input from the LC and, in turn, is embedded within a broader corticothalamic brainstem network.

**
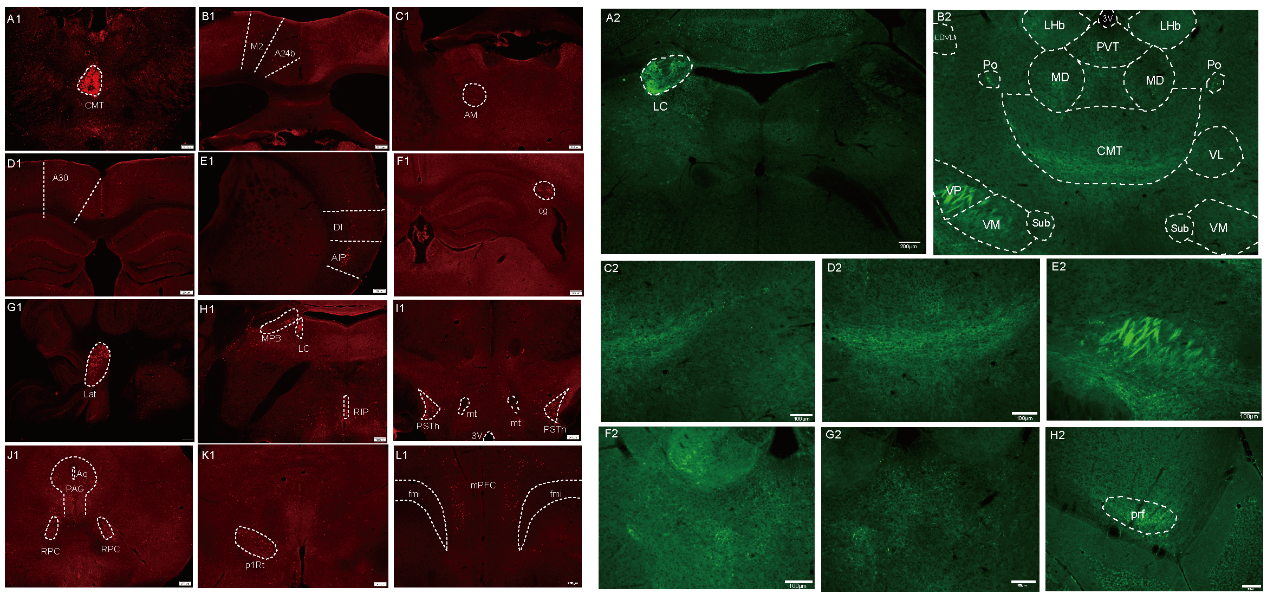
**

Supplementary Figure 1. Anatomical connectivity between the locus coeruleus (LC) and the central medial thalamus (CMT). (A1–L1) Retrograde tracing from the CMT. rAAV retro hSyn Cre mCherry WPRE hGH was injected into the CMT to map its afferent inputs. (A1) Injection site centered in the CMT. (B1–L1) Representative coronal sections showing prominent mCherry labeled neurons in multiple upstream regions, including the secondary motor cortex (M2) and anterior cingulate area (A24b, B1), anteromedial thalamic nucleus (AM, C1), cingulate cortex area 30 (A30, D1), dysgranular insular cortex (DI) and agranular insular cortex posterior part (AIP, E1), cingulate gyrus (cg, F1), lateral cerebellar nucleus (Lat, G1), medial parabrachial nucleus (MPB) and LC (H1), median raphe/interposed nucleus (RIP, H1), posterior hypothalamic/parabrachial area (PSTh, I1), periaqueductal gray (PAG) and red nucleus (RPC, J1), pontine reticular formation (P1Rt, K1), and medial prefrontal cortex (mPFC, L1). These data indicate that the CMT integrates convergent inputs from widespread cortical, thalamic, brainstem, and cerebellar structures, including the LC. (A2–H2) Anterograde tracing from the LC. To delineate LC efferent projections, rAAV EF1α hChR2 EGFP WPRE pA was injected into the LC (coordinates: AP −5.30 mm, ML −1.05 mm, DV −3.85 mm; 120 nL per side at 12 nL/min). (A2) Injection site confined to the LC. (B2) Low magnification view of EGFP labeled LC axons in forebrain and thalamus, revealing projections to the lateral habenular nucleus (LHb), paraventricular thalamic nucleus (PVT), mediodorsal thalamic nucleus (MD), posterior thalamic nucleus (Po), CMT, ventrolateral thalamic nucleus (VL), ventromedial thalamic nucleus (VM), ventral pallidum (VP), and laterodorsal thalamic/ventrolateral region (LDVL), with particularly dense fiber innervation in the CMT. (C2–H2) Higher magnification images of LC axons in selected downstream targets, including PVT (C2), MD (D2), VP/VM (E2), CMT (F2, G2), and pontine reticular formation (Prf, H2). Scale bars are indicated in each panel.
